# Supplementary material for: Inactivation and Degradation of Influenza A Virus on the Surface of Photoactive Self-Cleaning Cotton Fabric Functionalized with Nanocrystalline TiO2
Source: MDPI journal article supplement (doi:10.3390/catal12111298), 2022-10-23
Supplement: s1 [file s1]

Archive with 1 entries (1 files):
- catalysts-1954170-supplementary.pdf
